# Supplementary material
Source: MDPI journal article supplement (https://www.mdpi.com/2073-4352/12/10/1328)
Supplement: s1 [file s1]

# *Supplementary Information*

## **Green Synthesized Cu<sub>2</sub>O-Cu(OH)<sub>2</sub>@Cu Mesh Composites with Fenton-Like Catalytic Properties for the Degradation of Cationic and Anionic Dyes**

**Hala A. Al-Jawhari <sup>1,\*</sup>, and Nuha A. Alhebshi <sup>1</sup>**

<sup>1</sup> Department of Physics, King Abdulaziz University, Jeddah 21589, Saudi Arabia

\* Correspondence: [haljawhari@kau.edu.sa](mailto:haljawhari@kau.edu.sa)

## 1. Supplementary Information

### Supposed Mechanism of Spinach Extract:

It has been reported that the rate of copper oxidation under humid conditions can be accelerated significantly in presence of alkali solutions [21, 22]. In such process  $\text{Cu}^{2+}$  ions are released constantly from the Cu substance into the alkali solutions whereas the naturally dissolved  $\text{O}_2$  is reduced. Spinach is known as one of the alkaline powerhouse that has pH level of 6.6 -7.2 when cooked

We presume that the growth mechanism of  $\text{Cu}_2\text{O}$  from Cu particles in the alkaline spinach solution can be described with the same steps presented in [21].

The  $\text{O}_2$  in air is dissolved in the solution and then adsorbed on the surface of Cu particles. This  $\text{O}_2$  adsorption will oxidize the Cu atoms to  $\text{Cu}^{2+}$  ions as the following:

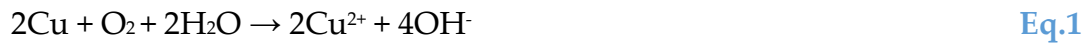

Through a very short time the  $\text{Cu}^{2+}$  ions can be captured through the coordination with  $\text{OH}^-$  to form  $\text{Cu}(\text{OH})_2$  according to the reaction;

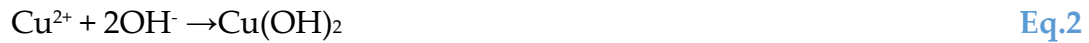

Consequently,  $\text{Cu}(\text{OH})_2$  can be transformed to monoclinic  $\text{CuO}$  at low temperature of  $60^\circ\text{C}$ , following this reaction;

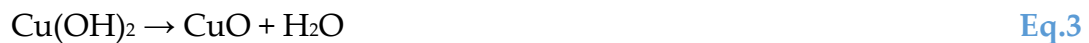

In the presence of a reductant (such as glycerol in our case), the final compounds could be  $\text{Cu}_2\text{O}$  and glyceric acid according to the following equation:

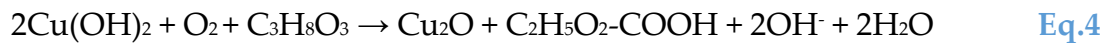

## 2. Supplementary Tables

**Table S1.** Peak centers and peak areas of the Cu 2p for Cu M@200 and SG-Cu M@200 samples

| Peak Parameters                                                                                                             | Cu M@200             |                      | SG-Cu M@200          |                      |
|-----------------------------------------------------------------------------------------------------------------------------|----------------------|----------------------|----------------------|----------------------|
|                                                                                                                             | Cu 2p <sub>3/2</sub> | Cu 2p <sub>1/2</sub> | Cu 2p <sub>3/2</sub> | Cu 2p <sub>1/2</sub> |
| Peak Center of Cu <sup>+</sup> in Cu <sub>2</sub> O                                                                         | 932.4 eV             | 952.4 eV             | 932.5 eV             | 952.4-5 eV           |
| Peak Center of Cu <sup>2+</sup> in CuO                                                                                      | 933.7 eV             | 953.7 eV             | ----                 | ----                 |
| Peak Center of Cu <sup>2+</sup> in Cu(OH) <sub>2</sub>                                                                      | 935.0 eV             | 955.0 eV             | 934.5 eV             | 954.5 eV             |
| Peak Area of Cu <sup>+</sup> in Cu <sub>2</sub> O                                                                           | 4000 a.u.            | 1790 a.u.            | 900                  | 400                  |
| Peak Area of Cu <sup>2+</sup> in CuO                                                                                        | 4000 a.u.            | 1790 a.u.            | 0                    | 0                    |
| Peak Area of Cu <sup>2+</sup> in Cu(OH) <sub>2</sub>                                                                        | 2000 a.u.            | 895 a.u.             | 1800                 | 800                  |
| Area Ratios of<br>Cu <sup>+</sup> : Cu <sup>2+</sup> : Cu <sup>2+</sup> in<br>Cu <sub>2</sub> O : CuO : Cu(OH) <sub>2</sub> | 2 : 2 : 1            | 2 : 2 : 1            | 1 : 0 : 2            | 1 : 0 : 2            |

**Table S2.** Peak centers and peak areas of O 1s for Cu M@200 and SG-Cu M@200 samples

| Peak Parameters                                              | Cu M@200  | SG-Cu M@200 |
|--------------------------------------------------------------|-----------|-------------|
|                                                              | O 1s      | O 1s        |
| Center of O <sup>2-</sup> in Cu <sub>2</sub> O               | 530.8 eV  | 530.8 eV    |
| Center of O <sup>2-</sup> in CuO                             | 529.8 eV  | ----        |
| Center of O-surf. in Cu(OH) <sub>2</sub>                     | 531.9 eV  | 531.9 eV    |
| Center of O-surf. in Cu(OH) <sub>2</sub>                     | 533.4 eV  | 533.4 eV    |
| Area of O <sup>2-</sup> in Cu <sub>2</sub> O                 | 1000 a.u. | 1000 a.u.   |
| Area of O <sup>2-</sup> in CuO                               | 2078 a.u. | 0           |
| Area of O-surf. in Cu(OH) <sub>2</sub>                       | 2006 a.u. | 5030        |
| Area of O-surf. in H <sub>2</sub> O                          | 1678 a.u. | 1622 a.u.   |
| Area Ratios in Cu <sub>2</sub> O : CuO : Cu(OH) <sub>2</sub> | 1 : 2 : 2 | 1 : 0 : 5   |

**Table. S3** Brief comparison between our results and other reported Cu<sub>x</sub>O@Cu composites

| Catalyst                                             | Form   | Preparation Temp /time              | dye | Light             | Intensity (mW/cm <sup>2</sup> ) | Degrad. % | Rate m.min <sup>-1</sup> | Time (min) | year      | Ref. |
|------------------------------------------------------|--------|-------------------------------------|-----|-------------------|---------------------------------|-----------|--------------------------|------------|-----------|------|
| Cu <sub>2</sub> O-Cu(OH) <sub>2</sub> @Cu            | Mesh   | Green synthesis 200°C /1 hr         | MB  | Natural sun light | 5                               | 89.4%     | 94.5                     | 90         | This work |      |
|                                                      |        |                                     | MO  |                   |                                 | 93%       | 126.5                    | 40         |           |      |
| Cu <sub>x</sub> O@Cu + H <sub>2</sub> O <sub>2</sub> | Mesh   | Green synthesis 300°C /1 hr         | MB  | Natural sun light | 7                               | 100%      | 63.2                     | 60         | 2020      | [14] |
| Cu <sub>x</sub> O@Cu                                 | Mesh   | Green synthesis 300°C /1 hr         | MB  | Natural sun light | 7                               | 52%       | 9                        | 120        | 2020      | [14] |
| Cu/Cu <sub>2</sub> O                                 | Film   | Green synthesis 200°C /0.5 hr       | MB  | Natural sun light | 3                               | 97.7%     | 20                       | 180        | 2019      | [13] |
| Cu/Cu <sub>2</sub> O/CuO                             | Mesh   | Thermal oxidation 500°C / 9 h       | RhB | Visible (lamp)    | 13.8                            | 72 %      | 12                       | 120        | 2017      | [34] |
| Cu/CuO + H <sub>2</sub> O <sub>2</sub>               | Film   | Sputtered @ RT + chemical reduction | MB  | Visible (lamp)    | 50                              | 100%      | 40                       | 120        | 2017      | [35] |
| Cu/Cu <sub>2</sub> O                                 | Powder | Green synthesis 400°C /2 h          | MB  | Visible (lamp)    | 50                              | 99 %      | -                        | 150        | 2017      | [36] |
| Cu-CuO + H <sub>2</sub> O <sub>2</sub>               | Powder | Chemical microreactor               | MB  | UV                | -                               | 98.5%     | 109                      | 50         | 2017      | [37] |
| CuO/Cu <sub>2</sub> O NWs                            | powder | Chemical method 40°C for 6 h        | MO  | Visible (lamp)    | 150                             | 100%      | -                        | 30         | 2017      | [38] |

### 3. Supplementary Figures

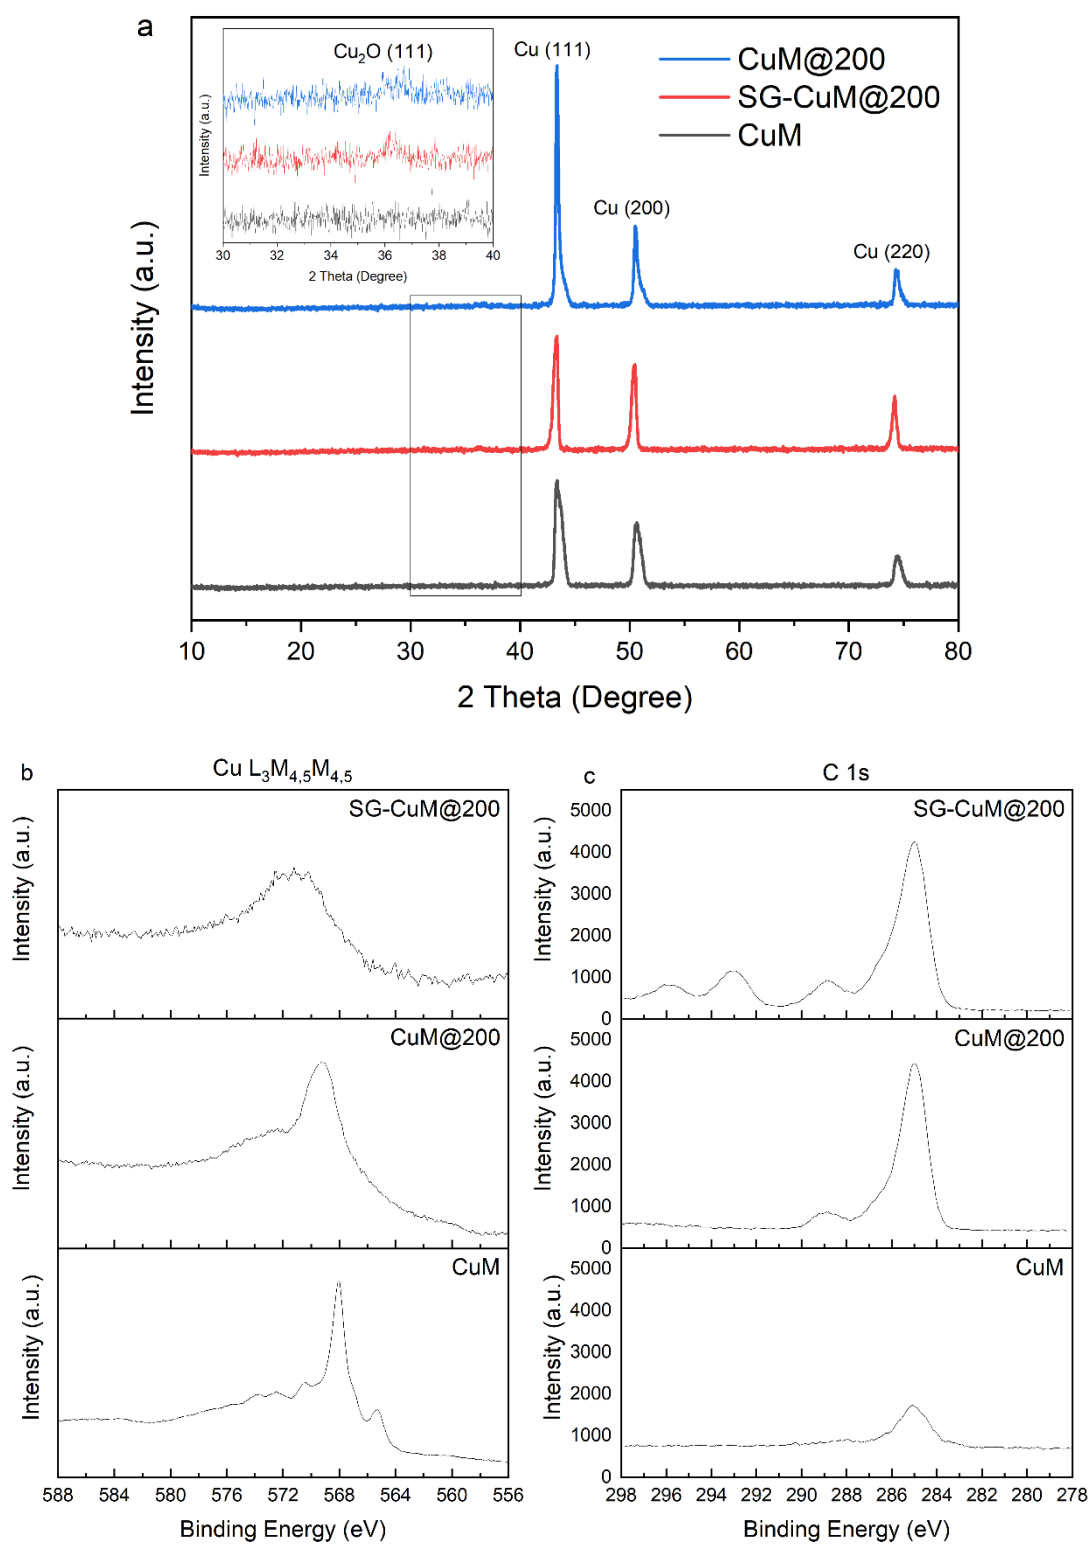

**Figure S1.** (a) XRD spectra, (b) XPS spectra of  $\text{Cu L}_{3/2}\text{M}_{4,5}\text{M}_{4,5}$  and (c) XPS spectra of C 1s core peaks for as-prepared CuM, CuM@200 and SG-CuM@200 samples

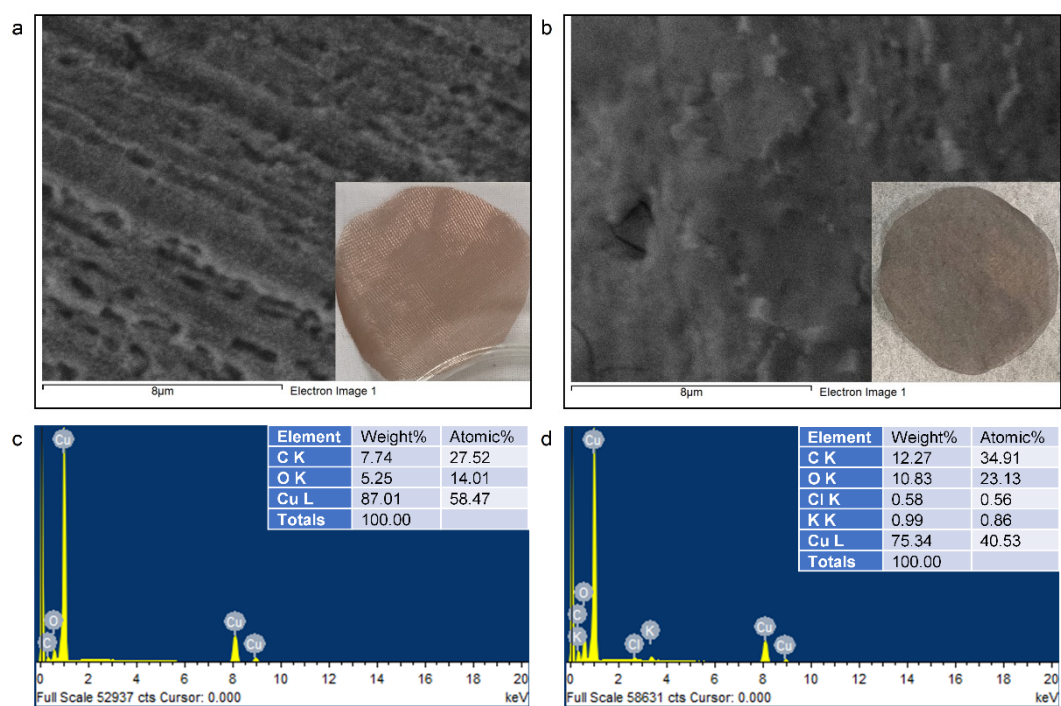

**Figure S2.** (a and b) SEM images of the as-prepared CuM and SG-CuM@200 samples, respectively, with photographs of the samples in the insets and (c and d) EDS spectra of both samples, respectively, with tables of the elemental and atomic weight percentages

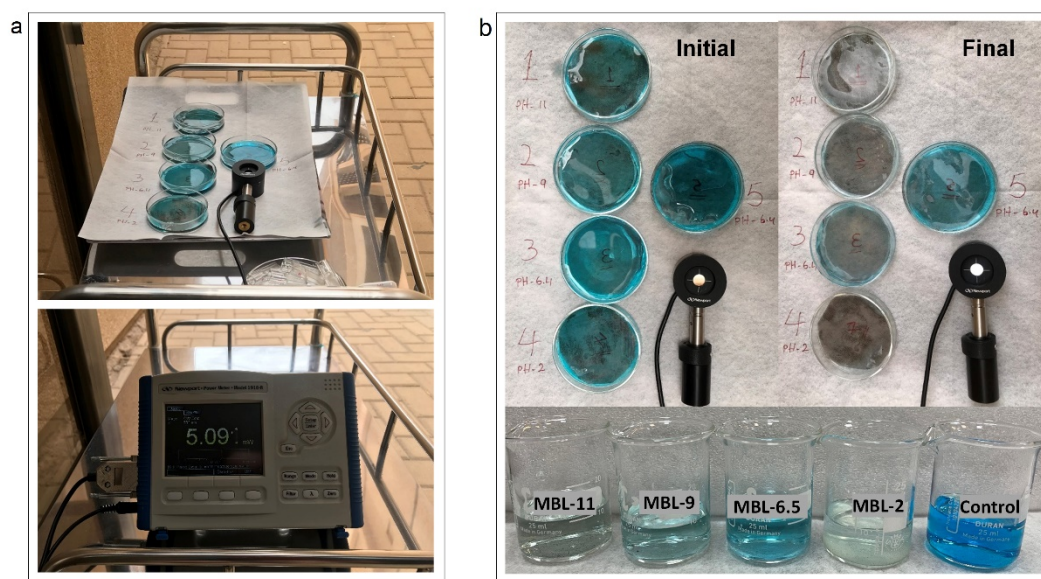

**Figure S3.** Photographs of (a) the experiments setup with the photodetector and samples exposed to natural sunlight in a shaded area and (b) the initial and final visualized color of the MB dyes on the disks and their final degraded dyes in the beakers

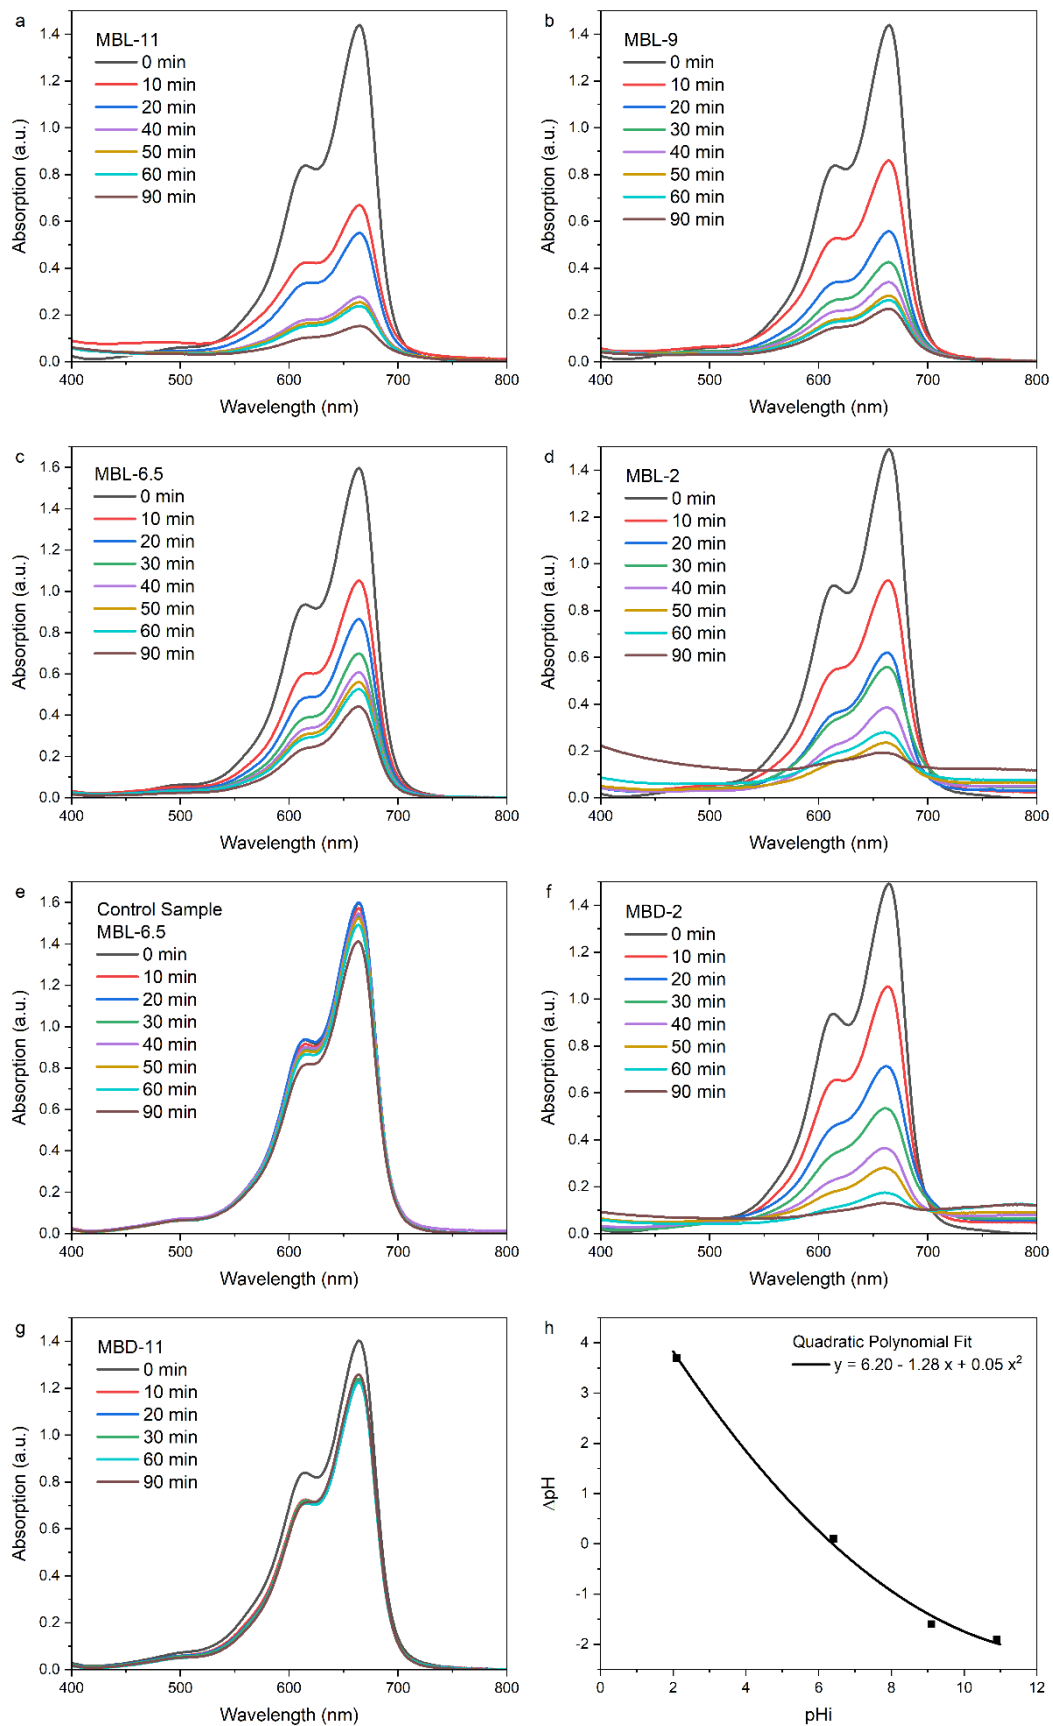

**Figure S4.** (a-g) UV-Vis absorption spectra of MBL-11, MBL-9, MBL-6.5, MBL-2, control sample MBL-6.5, MBD-2, and MBD-11, respectively, during 90 minutes and (h) the change between the final and initial pH values ( $\Delta\text{pH}$ ) for all these samples

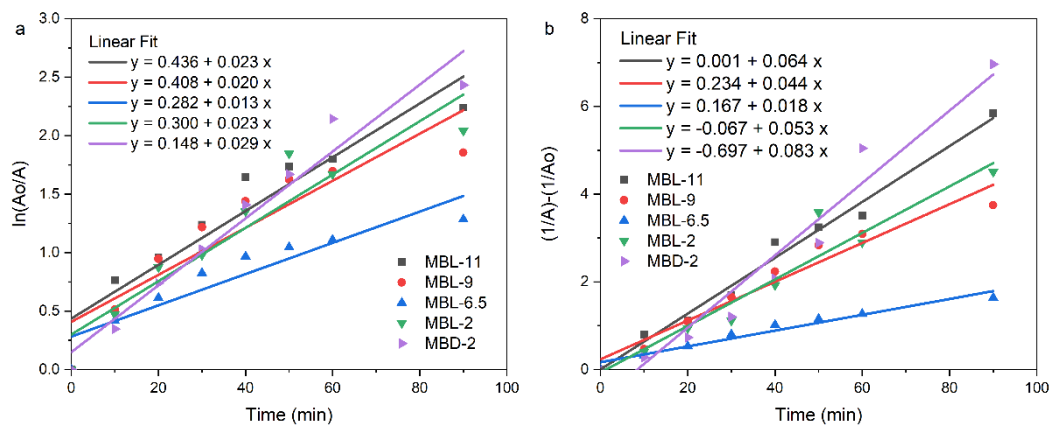

**Figure S5.** The linear fitting of the MB experimental data with (a) the first-order kinetic model, and (b) the second-order kinetic model

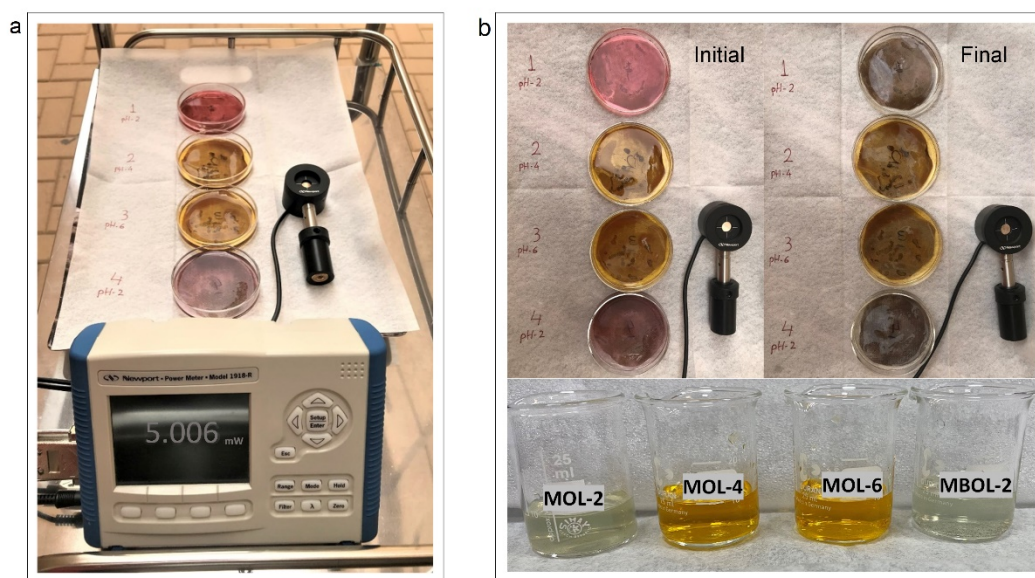

**Figure S6.** Photographs of (a) the experiments setup with the photodetector and samples exposed to natural sunlight in a shaded area and (b) the initial and final visualized color of the MO and MB/MO dyes on the disks and their final degraded dyes in the beakers

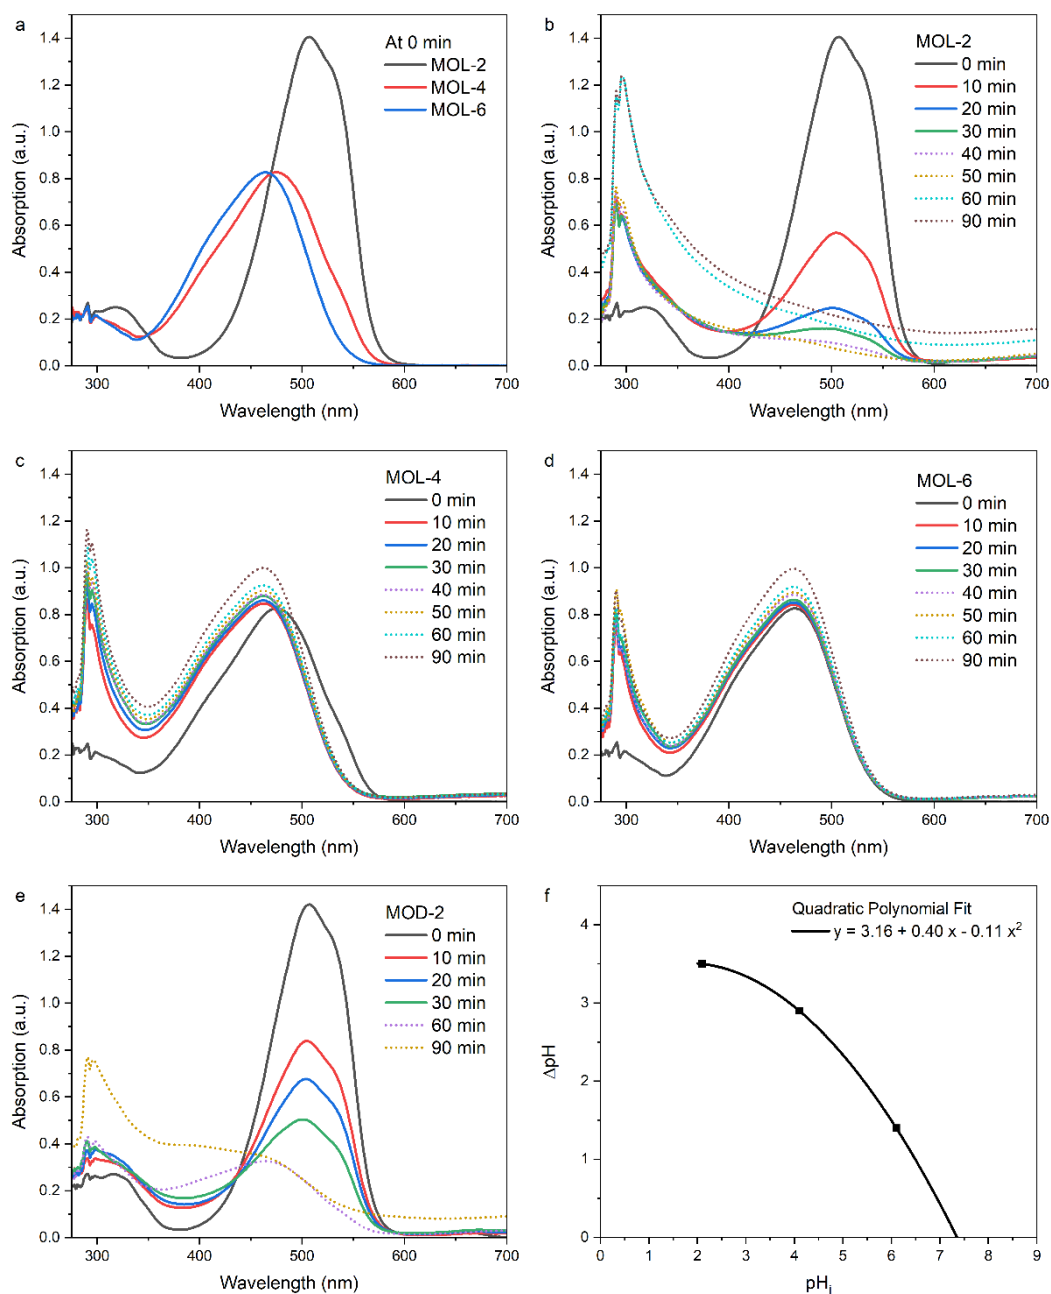

**Figure S7.** (a) UV-Vis absorption spectra at initial pH values and (b-e) UV-Vis absorption spectra of MOL-2, MOL-4, MOL-6, and MOD-2, respectively, during 90 minutes and (f) the change between the final and initial pH values ( $\Delta\text{pH}$ ) for all these samples

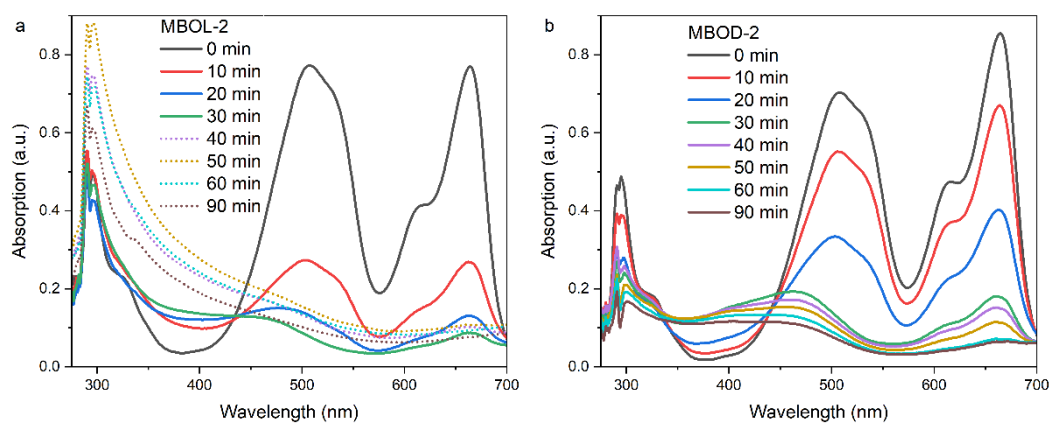

**Figure S8.** (a and b) UV-Vis absorption spectra of MBOL-2 and MBOD-2, respectively, during 90 minutes.
